# Supplementary material
Source: PubMed Central journal article supplement (PMC4793441)
Supplement: donj014343.ww1_default.pdf [file donj014343.ww1_default.pdf]

Details of the SQLape® algorithm:

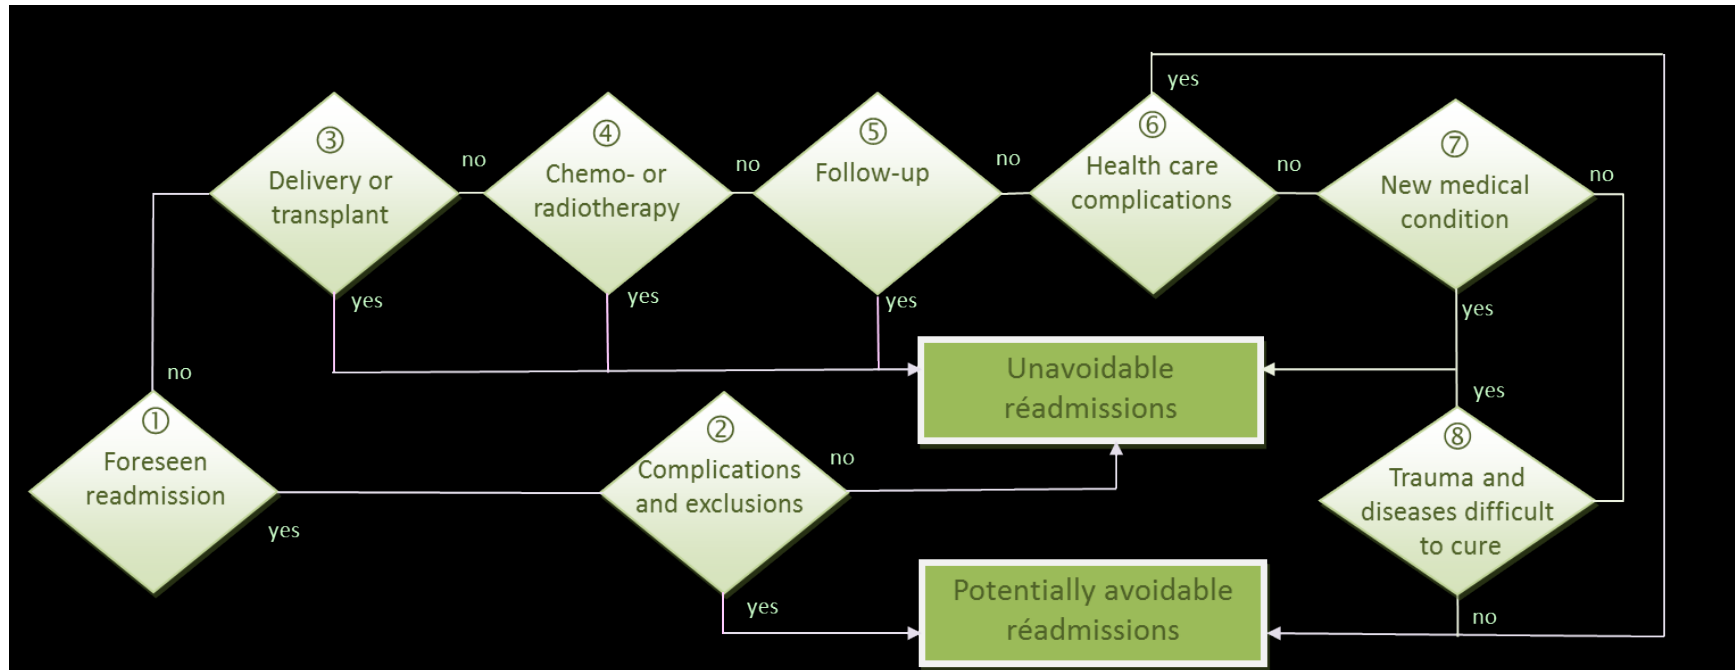

The groups of codes used in each step are protected by copyright (© Yves Egli, 2013), but can be consulted on the website [www.sqlape.com](http://www.sqlape.com)

(accessed on October 30, 2013)

Reproduced with the permission of Yves Egli.
